# Supplementary material
Source: Springer Nature journal article supplement (https://www.springermedizin.de/resource/supplementary/13256_2008_518_MOESM3_ESM.pdf/9646158)

A

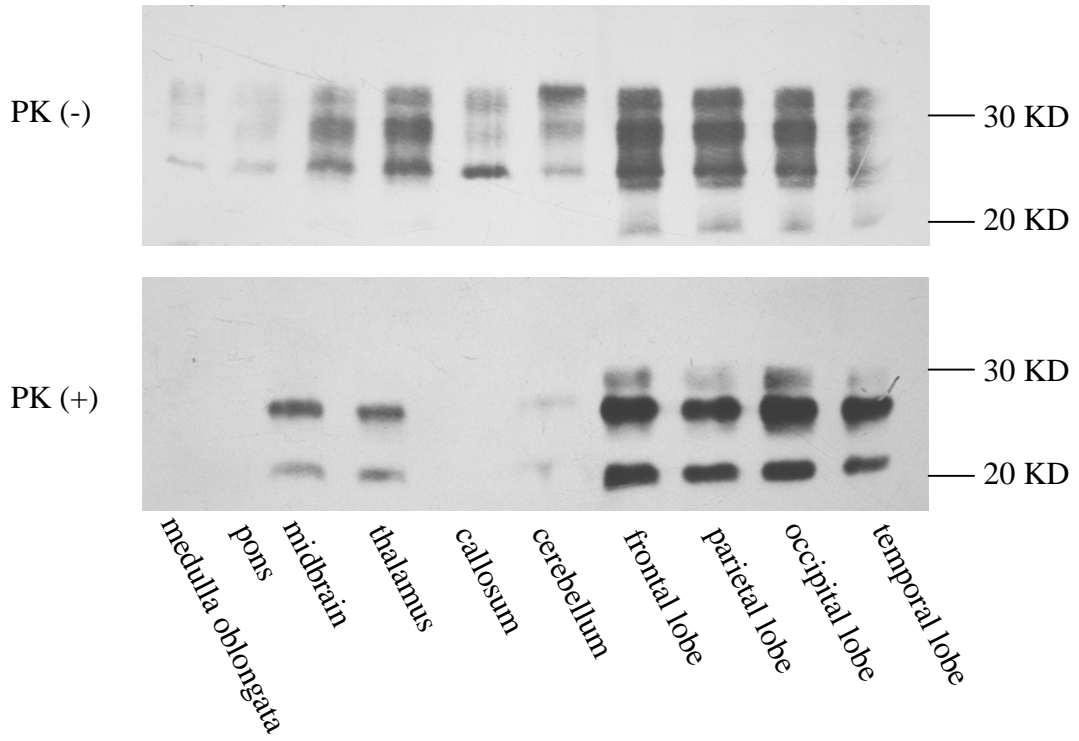

B

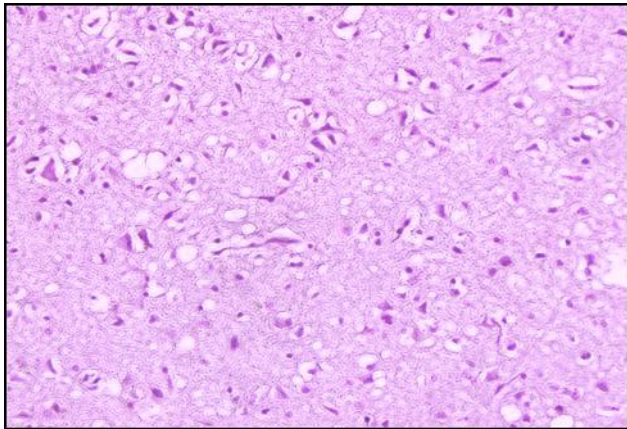

HE

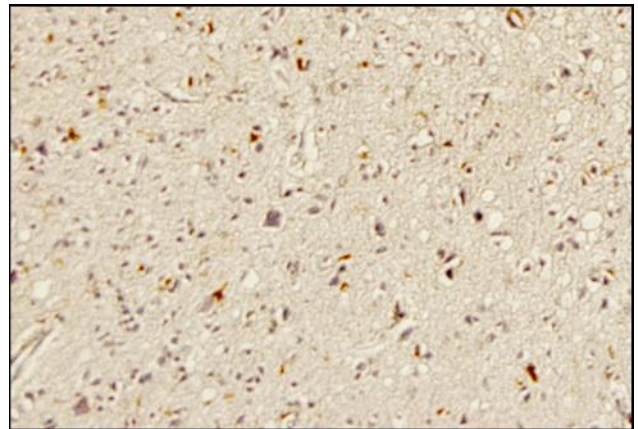

IHC

Supplement: MOESM3 [file 9646158]
